# Supplementary material for: Systematic Identification of Rhythmic Genes Reveals camk1gb as a New Element in the Circadian Clockwork
Source: PLoS Genet. 2012 Dec 20;8(12):e1003116. doi: 10.1371/journal.pgen.1003116 (PMC3527293; doi:10.1371/journal.pgen.1003116)
Supplement: Table S6 — DAVID analysis: a) genes that belong to the glycolysis pathway and b) genes that belong to the oxidation-reduction pathway. (XLS) [file pgen.1003116.s014.xls]

## Sheet: גיליון1
Table S6: DAVID analysis: a) genes that belong to the glycolysis pathway and b) genes that belong to the oxidation-reduction pathway
a)	Annotation term: Glycolysis
	RefSeq ID	Gene symbol	Gene name
1	NM_194377	aldoaa	aldolase a, fructose-bisphosphate, a
2	NM_131246	ldha	lactate dehydrogenase A4
3	NM_131247	ldhba	lactate dehydrogenase B4
4	NM_199969	mdh1b	malate dehydrogenase 1b, NAD (soluble)
5	NM_001089417	pfkmb	phosphofructokinase, muscle b
6	NM_213387	pgk1	phosphoglycerate kinase 1
7	NM_201289	pklr	pyruvate kinase, liver and RBC
8	NM_199333	pkm2a	pyruvate kinase, muscle, a
b)	Annotation term: Oxidation-Reduction
	RefSeq ID	Gene symbol	Gene name
1	NM_001007765	ndufs1	NADH dehydrogenase (ubiquinone) Fe-S protein 1
2	NM_213010	acadm	acyl-Coenzyme A dehydrogenase, C-4 to C-12 straight chain
3	NM_131850	aldh1a2	aldehyde dehydrogenase 1 family, member A2
4	NM_201158	aldh4a1	aldehyde dehydrogenase 4 family, member A1
5	NM_130912	cat	catalase
6	NM_001080204	cyp11c1	cytochrome P450, family 11, subfamily C, polypeptide 1
7	NM_001083049	cyp2p7	cytochrome P450, family 2, subfamily P, polypeptide 7
8	NM_200139	cyp2p6	cytochrome P450, family 2, subfamily P, polypeptide 6
9	NM_001025554	cyp2ad3	cytochrome P450, family 2, subfamily AD, polypeptide 3
10	NM_001082936	cyp2ad6	cytochrome P450, family 2, subfamily AD, polypeptide 6
11	NM_001113337	cyp27c1	cytochrome P450, family 27, subfamily C, polypeptide 1
12	NM_131246	ldha	lactate dehydrogenase A4
13	NM_131247	ldhba	lactate dehydrogenase B4
14	NM_199969	mdh1b	malate dehydrogenase 1b, NAD (soluble)
15	NM_214691	p4ha1b	procollagen-proline, 2-oxoglutarate 4-dioxygenase (proline 4-hydroxylase), alpha polypeptide I
16	NM_199609	dhrs9	retinol dehydrogenase 1, like
17	NM_001044834	si:dkey-239i20.4	flavin monooxygenase
18	NM_001017881	sqrdl	sulfide quinone reductase-like (yeast)
19	NM_001007445	phyhd1	phytanoyl-CoA dioxygenase domain containing 1
20	NM_001013485	zgc:110782	Uncharacterized oxidoreductase
21	NM_001013555	zgc:113006	amine oxidase copper containing 3
22	NM_001025177	dusp12	dual specificity phosphatase 12
23	NM_200567	zgc:65987	dehydrogenase/reductase SDR family member 4
24	NM_001004598	etfdh	electron-transferring-flavoprotein dehydrogenase
25	NM_001002369	zgc:92502	aflatoxin B1 aldehyde reductase member 2
